# Supplementary material for: Internalization and accumulation of model lignin breakdown products in bacteria and fungi
Source: PubMed Central journal article supplement (PMC6607601; doi:10.1186/s13068-019-1494-8), 2019-07-03

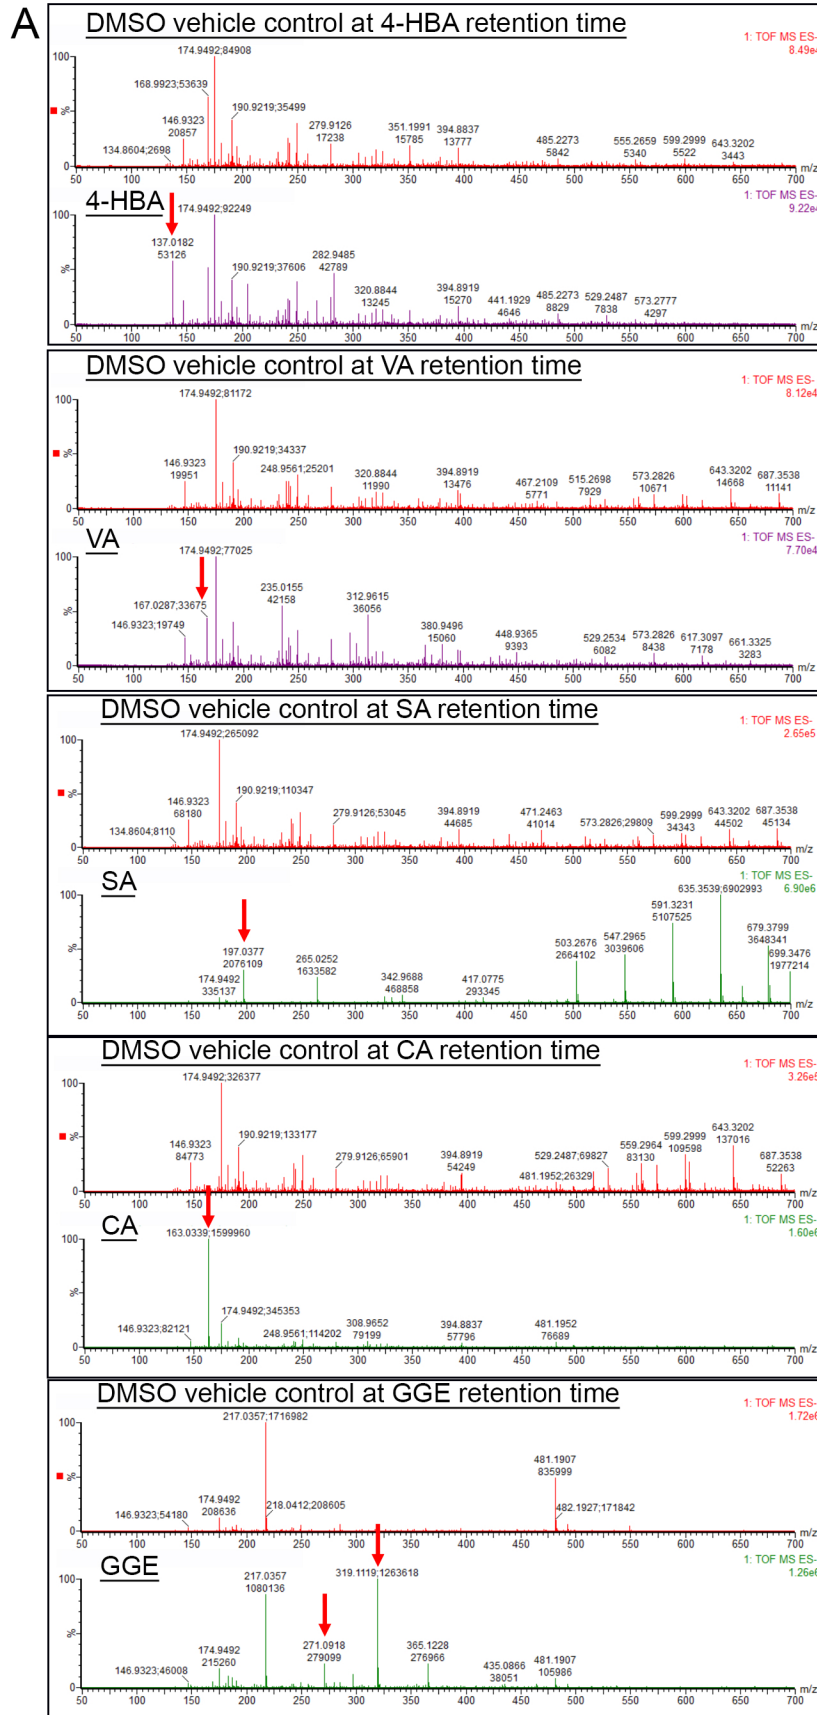

**B** Internalization in lignolytic fungi *P. chrysosporium*

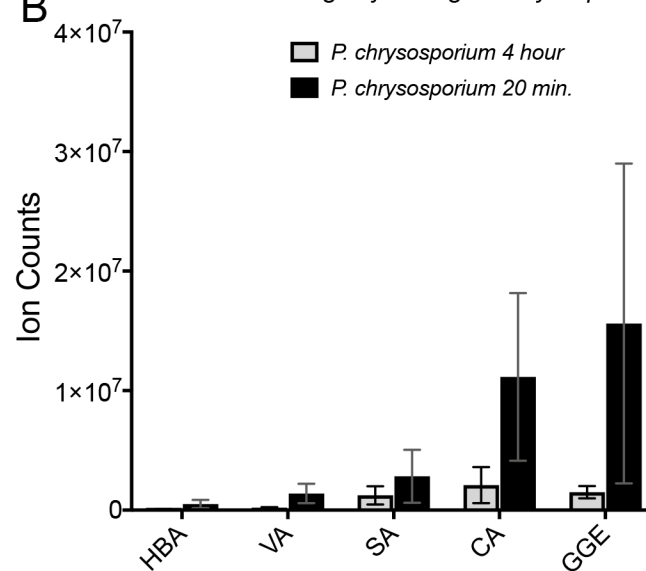

**C**

|       | <i>P. chrysosporium</i> 0.005mM Spike | <i>P. chrysosporium</i> 0.0025mM Spike |
|-------|---------------------------------------|----------------------------------------|
| 4-HBA | --                                    | 20540                                  |
| VA    | --                                    | 49045                                  |
| SA    | 270974                                | --                                     |
| CA    | 2660226                               | --                                     |
| GGE   | 707870                                | --                                     |

**Fig. S1:** A. Representative mass spectra (QToF-MS) for each uptake compound (4-HBA, VA, SA, CA, and GGE) in *P. chrysosporium* lysates. DMSO vehicle control mass spectra are shown at the retention time for each compound of interest for peak comparison. Red arrows mark the integrated peak for results in B (4 hours). B. Ion counts for each compound in *P. chrysosporium* cell lysates from 3 biological replicates. Error bars are standard deviation. C. Ion counts for spiked *P. chrysosporium* lysate with indicated compounds at a concentration of 0.005 or 0.0025mM. Spikes were used to calculate the relative lysate concentrations in Fig. 1 from ion counts in Fig. S1B. D. Representative mass spectra for protocatechuate (GGE metabolite) in *P. chrysosporium* lysates at 4 hours. DMSO vehicle control mass spectra shown at the same retention time for peak comparison. Black arrows mark the integrated metabolite peak for Fig. 1C.

**D**

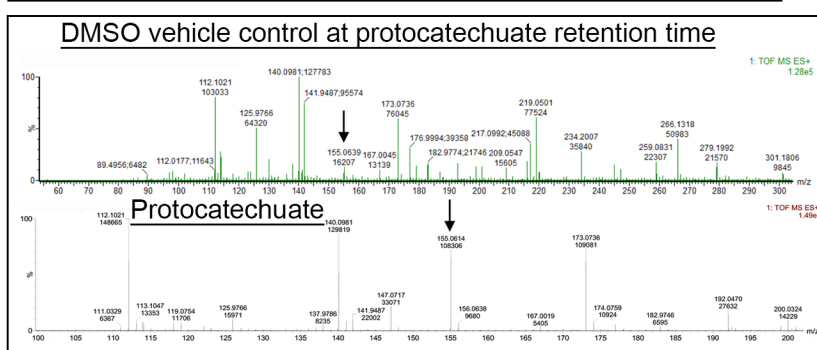

Supplement: 13068_2019_1494_MOESM1_ESM.pdf [file 13068_2019_1494_MOESM1_ESM.pdf]
