# Supplementary material for: Internalization and accumulation of model lignin breakdown products in bacteria and fungi
Source: PubMed Central journal article supplement (PMC6607601; doi:10.1186/s13068-019-1494-8), 2019-07-03
Supplement: 13068_2019_1494_MOESM2_ESM.pdf [file 13068_2019_1494_MOESM2_ESM.pdf]

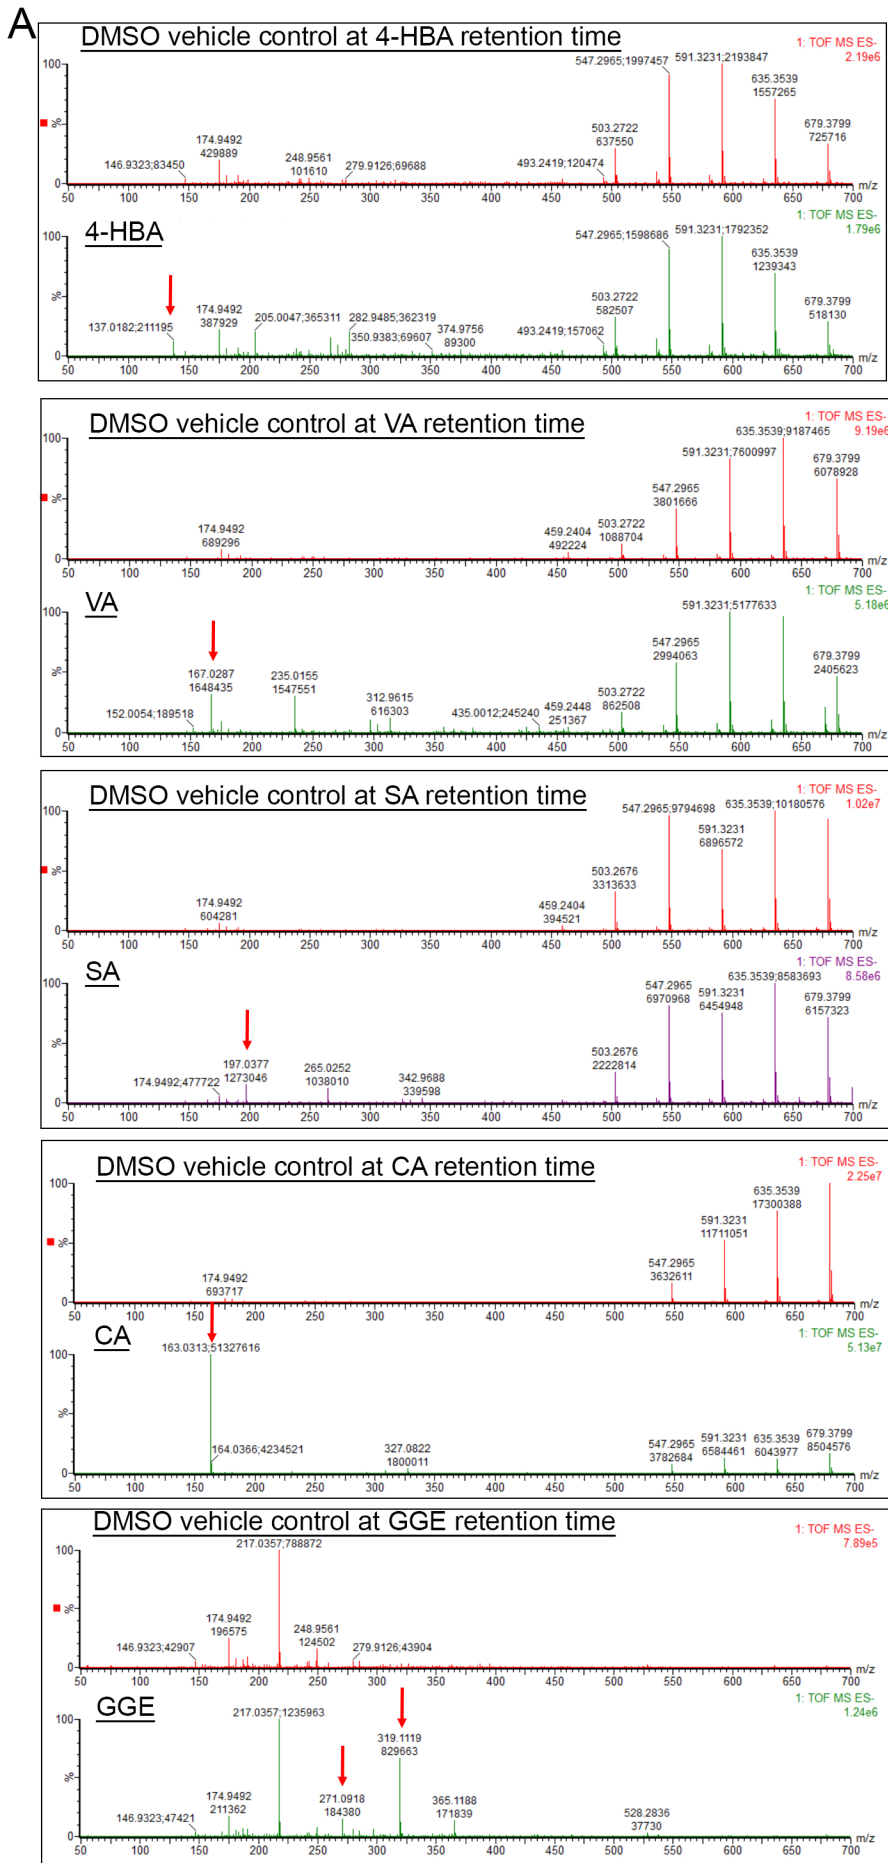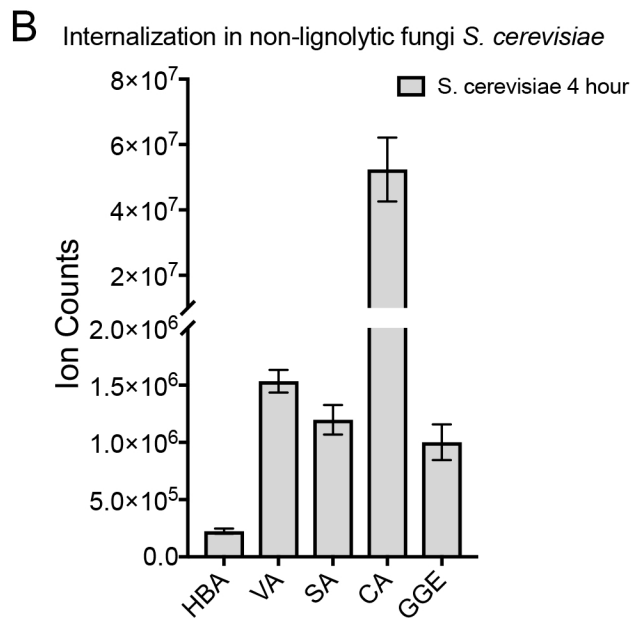

**C**

|       | <i>S. cerevisiae</i><br>0.005mM Spike |
|-------|---------------------------------------|
| 4-HBA | 126070                                |
| VA    | 722906                                |
| SA    | 539391                                |
| CA    | 2525796                               |
| GGE   | 1262382                               |

**Fig. S2:** A. Representative mass spectra (QToF-MS) for each uptake compound (4-HBA, VA, SA, CA, and GGE) in *S. cerevisiae* lysates. Integrated peak for internalization experiments is marked with a red arrow. DMSO vehicle control mass spectra are shown at the retention time for each compound of interest for peak comparison. B. Ion counts for each compound in *S. cerevisiae* cell lysates from 3 biological replicates. C. Ion counts for spiked *S. cerevisiae* lysate with indicated compounds at a concentration of 0.005mM. Spikes were used to calculate the relative intracellular concentrations in Fig. 1 from ion counts in Fig. S2C.
