# Supplementary material for: Internalization and accumulation of model lignin breakdown products in bacteria and fungi
Source: PubMed Central journal article supplement (PMC6607601; doi:10.1186/s13068-019-1494-8), 2019-07-03
Supplement: 13068_2019_1494_MOESM4_ESM.pdf [file 13068_2019_1494_MOESM4_ESM.pdf]

Figure S4: Table summarizing single cell fluorescence microscopy results.

|                        |              | Biological Replicate | Total # Cells | # + Cells | % + Cells | Mean Intensity | Std Dev Mean Intensity |
|------------------------|--------------|----------------------|---------------|-----------|-----------|----------------|------------------------|
| <i>E. coli</i>         | DMSO         | Rep 1                | 2599          | 6         | 0%        | n/a            | n/a                    |
|                        |              | Rep 2                | 4355          | 12        | 0%        | n/a            | n/a                    |
|                        |              | Rep3                 | 1995          | 7         | 0%        | n/a            | n/a                    |
|                        | 4-HBA analog | Rep 1                | 1212          | 43        | 4%        | 718.6          | 397.1                  |
|                        |              | Rep 2                | 2698          | 54        | 2%        | 760.5          | 355                    |
|                        |              | Rep3                 | 1408          | 75        | 5%        | 779.3          | 483.1                  |
|                        | VA analog    | Rep 1                | 745           | 241       | 32%       | 1853.8         | 1594.9                 |
|                        |              | Rep 2                | 2062          | 225       | 11%       | 1419.1         | 1367.4                 |
|                        |              | Rep3                 | 1109          | 295       | 27%       | 1802.7         | 1262                   |
| <i>E. lignolyticus</i> | DMSO         | Rep 1                | 577           | 6         | 1%        | n/a            | n/a                    |
|                        |              | Rep 2                | 485           | 8         | 2%        | n/a            | n/a                    |
|                        |              | Rep3                 | 524           | 6         | 1%        | n/a            | n/a                    |
|                        | 4-HBA analog | Rep 1                | 1184          | 257       | 22%       | 138.5          | 99                     |
|                        |              | Rep 2                | 854           | 517       | 61%       | 886.2          | 1821.7                 |
|                        |              | Rep3                 | 661           | 316       | 48%       | 306.7          | 549.9                  |
|                        | VA analog    | Rep 1                | 888           | 478       | 54%       | 1868           | 2141.7                 |
|                        |              | Rep 2                | 597           | 368       | 62%       | 959.2          | 1510.2                 |
|                        |              | Rep3                 | 1305          | 802       | 61%       | 605.1          | 369.4                  |
| <i>S. cerevisiae</i>   | DMSO         | Rep 1                | 130           | 10        | 8%        | n/a            | n/a                    |
|                        |              | Rep 2                | 169           | 0         | 0%        | n/a            | n/a                    |
|                        |              | Rep3                 | 252           | 3         | 1%        | n/a            | n/a                    |
|                        | 4-HBA analog | Rep 1                | 118           | 23        | 19%       | 1187.8         | 592.7                  |
|                        |              | Rep 2                | 586           | 67        | 11%       | 703.5          | 307.6                  |
|                        |              | Rep3                 | 215           | 53        | 25%       | 663.9          | 169.4                  |
|                        | VA analog    | Rep 1                | 532           | 271       | 51%       | 2650           | 2208.5                 |
|                        |              | Rep 2                | 400           | 117       | 29%       | 1977.8         | 1546.6                 |
|                        |              | Rep3                 | 191           | 124       | 65%       | 2934.2         | 1756.3                 |
| <i>P. chysosporium</i> | DMSO         | Rep 1                | 89            | 7         | 8%        | n/a            | n/a                    |
|                        |              | Rep 2                | 36            | 0         | 0%        | n/a            | n/a                    |
|                        |              | Rep3                 | 59            | 8         | 14%       | n/a            | n/a                    |
|                        | 4-HBA analog | Rep 1                | 183           | 12        | 7%        | 716.9          | 117.1                  |
|                        |              | Rep 2                | 153           | 0         | 0%        | 0              | 0                      |
|                        |              | Rep3                 | 244           | 94        | 39%       | 1126.9         | 454.1                  |
|                        | VA analog    | Rep 1                | 124           | 18        | 15%       | 2931.3         | 1528.9                 |
|                        |              | Rep 2                | 55            | 22        | 40%       | 4622           | 2758.6                 |
|                        |              | Rep3                 | 105           | 90        | 86%       | 3134.3         | 1281.5                 |
