# Supplementary material for: Internalization and accumulation of model lignin breakdown products in bacteria and fungi
Source: PubMed Central journal article supplement (PMC6607601; doi:10.1186/s13068-019-1494-8), 2019-07-03
Supplement: 13068_2019_1494_MOESM7_ESM.pdf [file 13068_2019_1494_MOESM7_ESM.pdf]

A

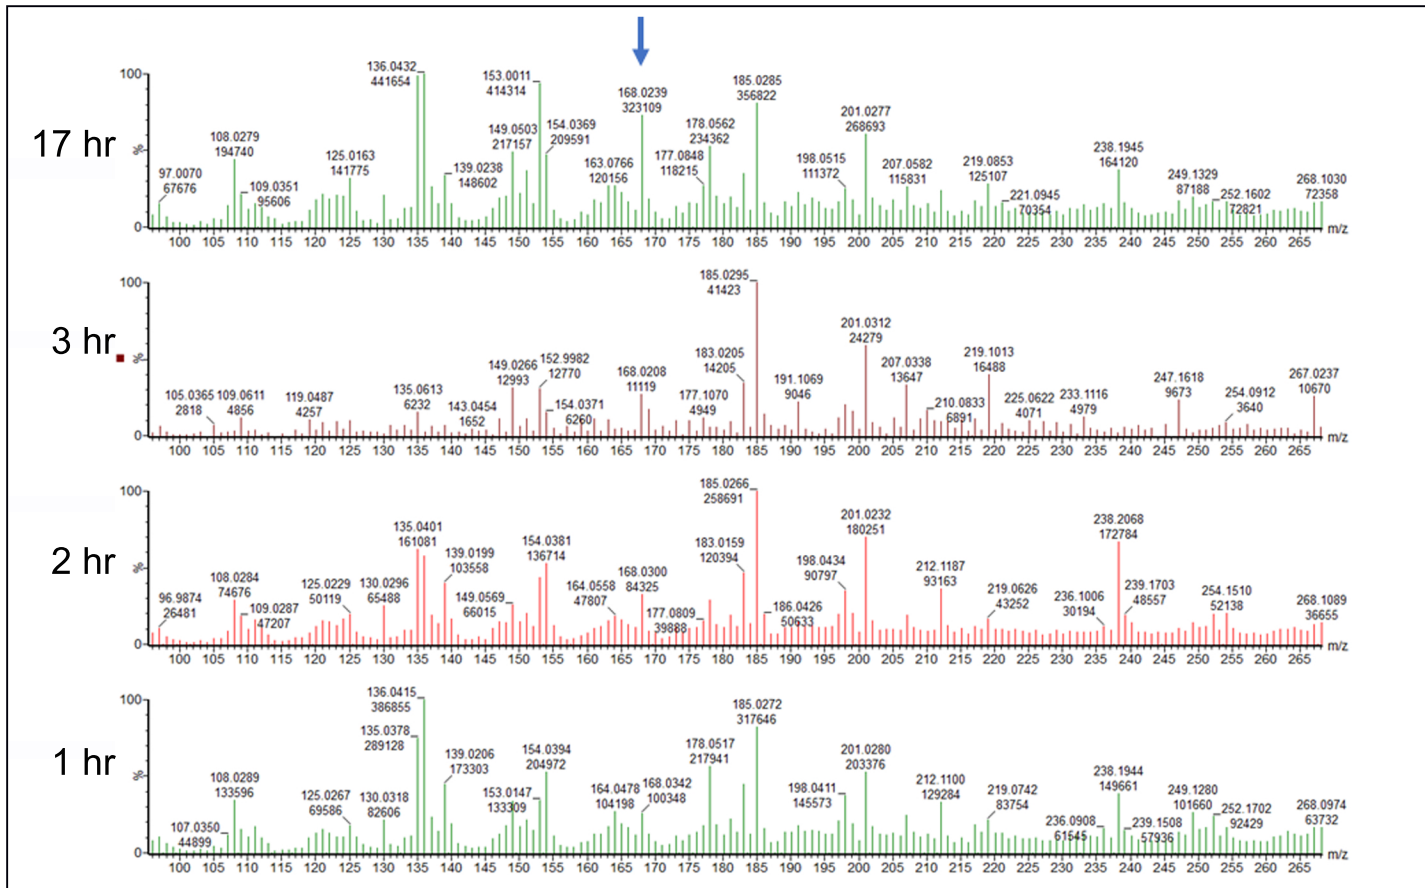

B

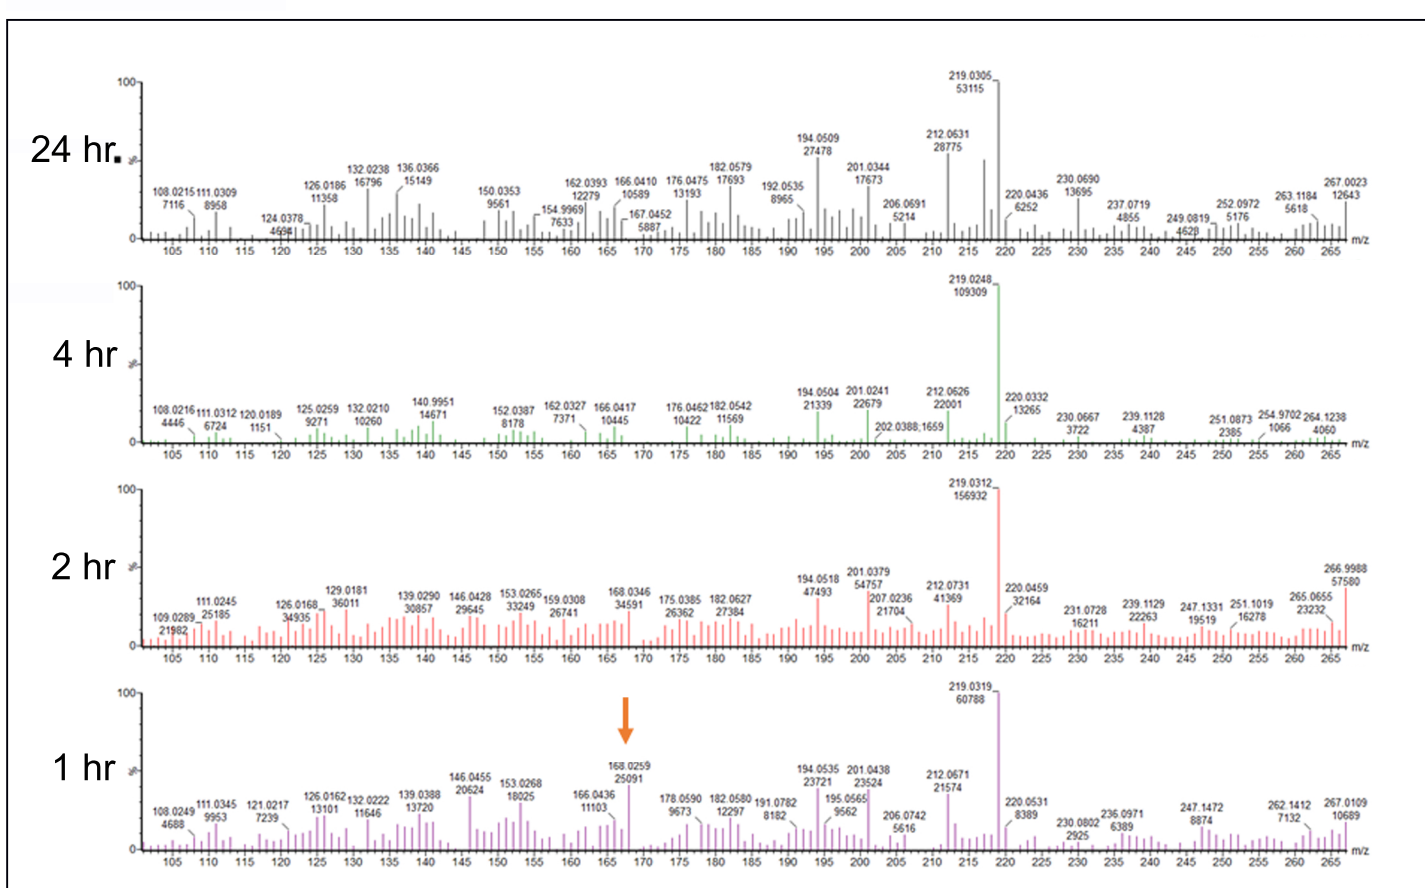

C

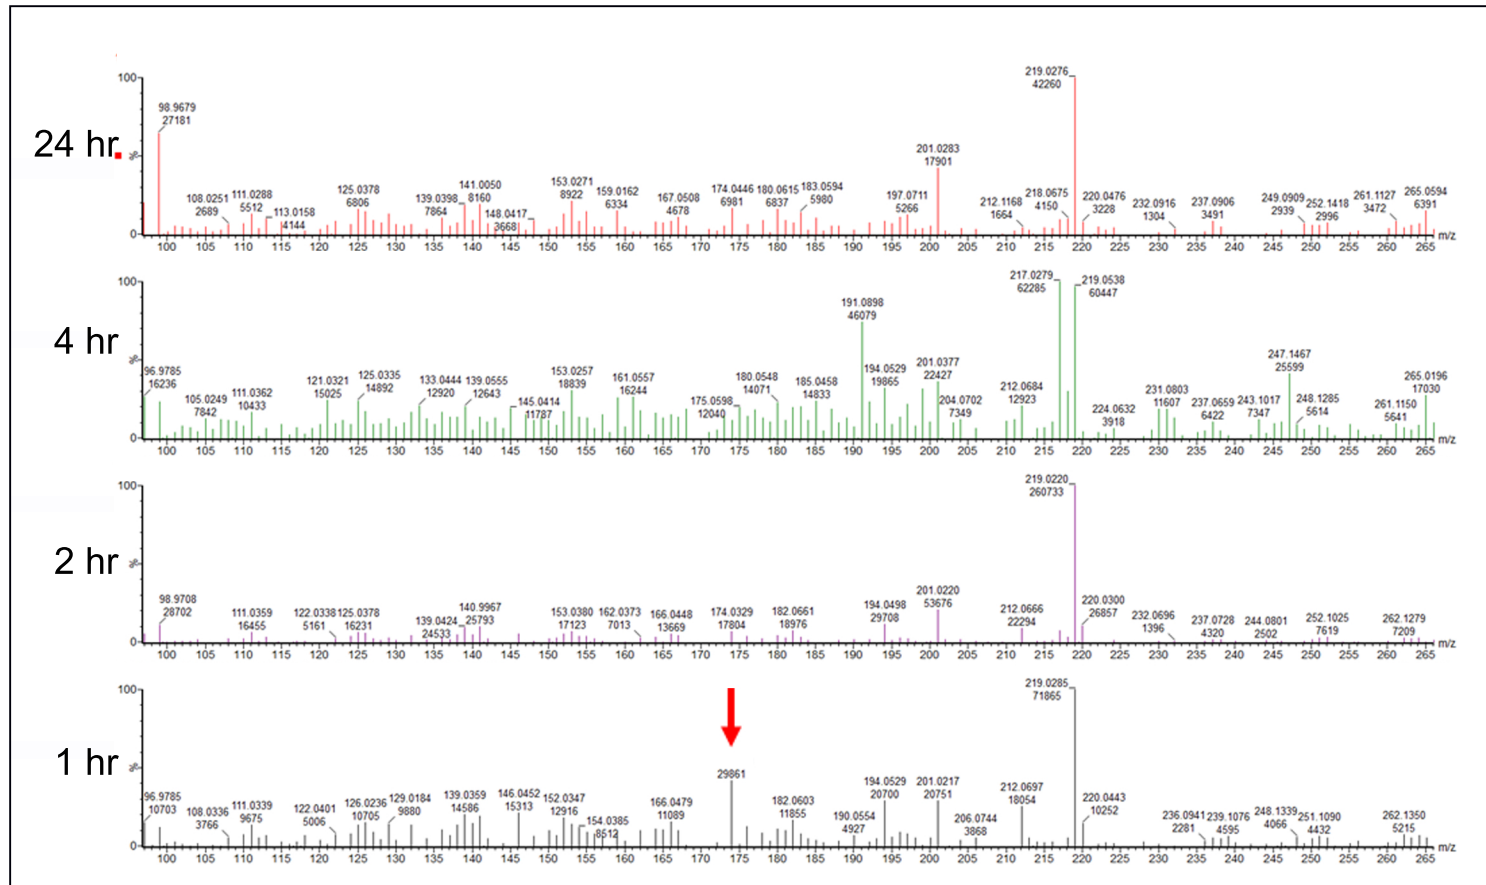

D

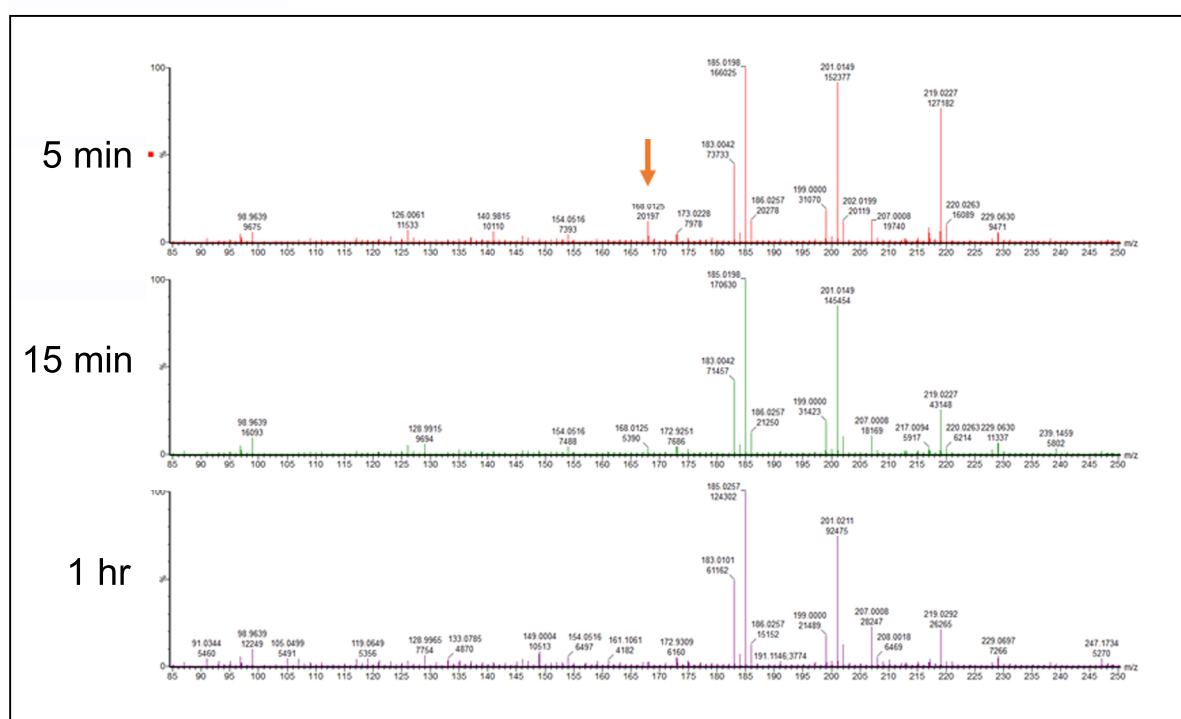

**Fig. S6:** A. ASAP-MS representative spectra of *S. cerevisiae* lysates incubated with vanillic acid for 1, 2, 3, or 17 hours. Blue arrow indicates integrated peak of interest for results displayed in Fig. 4C. B. ASAP-MS representative chromatogram of *P. chrysosporium* lysates incubated with vanillic acid for 1, 2, 4, or 24 hours. Orange arrow indicates integrated peak of interest for results displayed in Fig. 4B. C. ASAP-MS representative chromatogram of *P. chrysosporium* lysates incubated with <sup>13</sup>C labeled vanillic acid for 1, 2, 4, or 24 hours. Red arrow indicates integrated peak of interest for results displayed in Fig. 4B. D. ASAP-MS representative chromatogram of *P. chrysosporium* lysates incubated with vanillic acid for 5, 15, and 60 min. Orange arrow indicates integrated peak of interest for results displayed in Fig. 4B.
