# Supplementary material for: Internalization and accumulation of model lignin breakdown products in bacteria and fungi
Source: PubMed Central journal article supplement (PMC6607601; doi:10.1186/s13068-019-1494-8), 2019-07-03
Supplement: 13068_2019_1494_MOESM8_ESM.pdf [file 13068_2019_1494_MOESM8_ESM.pdf]

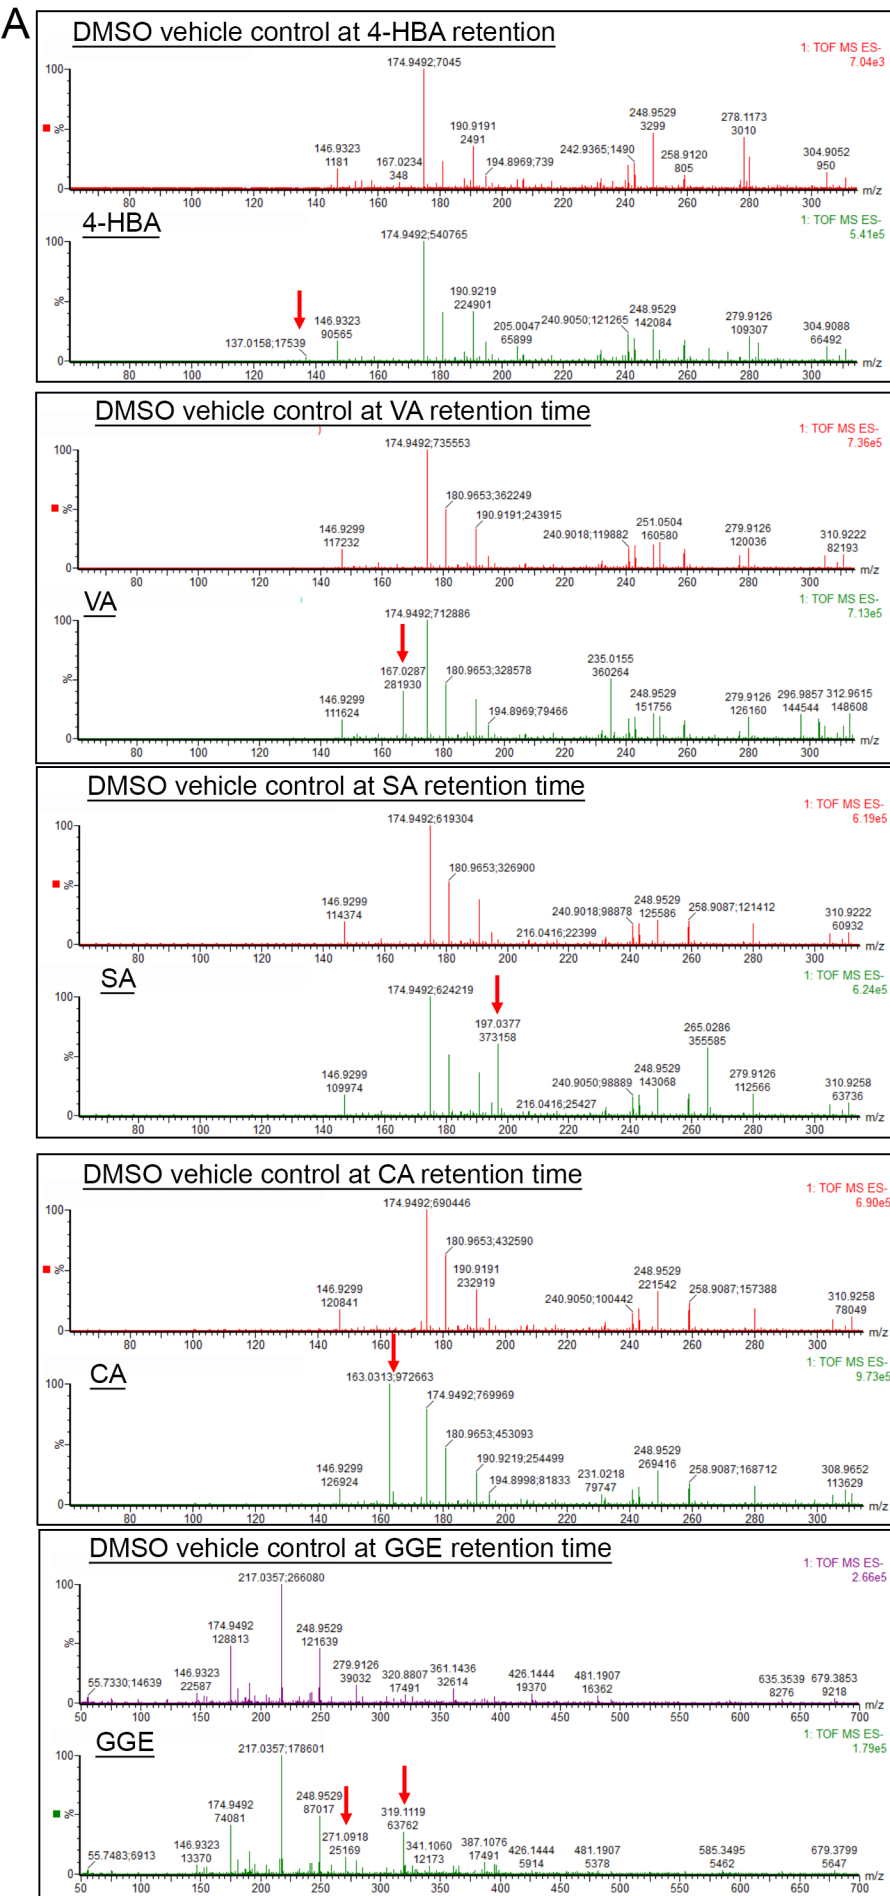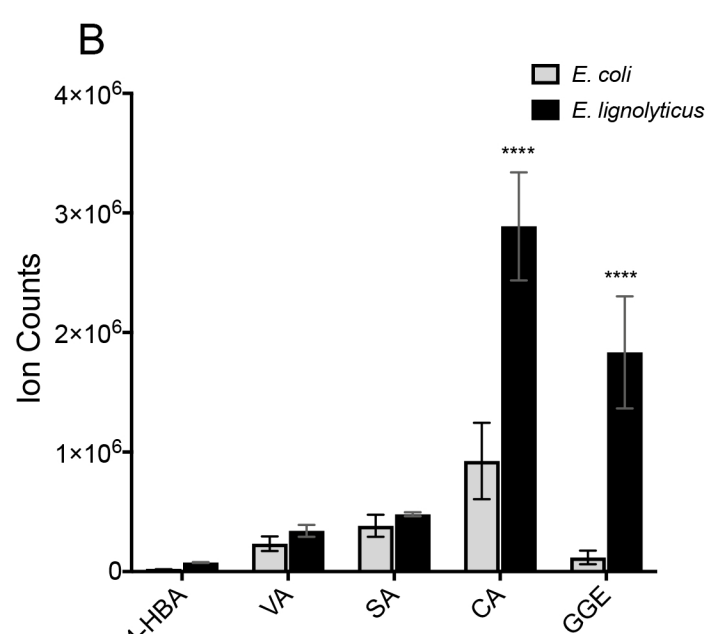

**C**

| 0.005mM Spike | <i>E. coli</i> | <i>E. lignolyticus</i> |
|---------------|----------------|------------------------|
| 4-HBA         | 134871         | 106419                 |
| VA            | 99805          | 903036                 |
| SA            | 539976         | 529417                 |
| CA            | 2546294        | 2716168                |
| GGE           | 1511458        | 1247085                |

**Fig. S8:** A. Representative mass spectra (QToF-MS) for each uptake compound (4-HBA, VA, SA, CA, and GGE) in *E. coli* lysates. Integrated peak for internalization experiments is marked with a red arrow. DMSO vehicle control mass spectra are shown at the retention time for each compound of interest for peak comparison. *E. lignolyticus* spectra look similar (data not shown). B. Ion counts for each compound in *E. coli* vs. *E. lignolyticus* cell lysates from 3 biological replicates. Error bars are standard deviation. C. Ion counts for spiked *E. coli* or *E. lignolyticus* lysate with indicated compounds at a concentration of 0.005mM. Spikes were used to calculate the relative intracellular concentrations in Fig. 5.
