# Supplementary material for: Internalization and accumulation of model lignin breakdown products in bacteria and fungi
Source: PubMed Central journal article supplement (PMC6607601; doi:10.1186/s13068-019-1494-8), 2019-07-03
Supplement: 13068_2019_1494_MOESM10_ESM.pdf [file 13068_2019_1494_MOESM10_ESM.pdf]

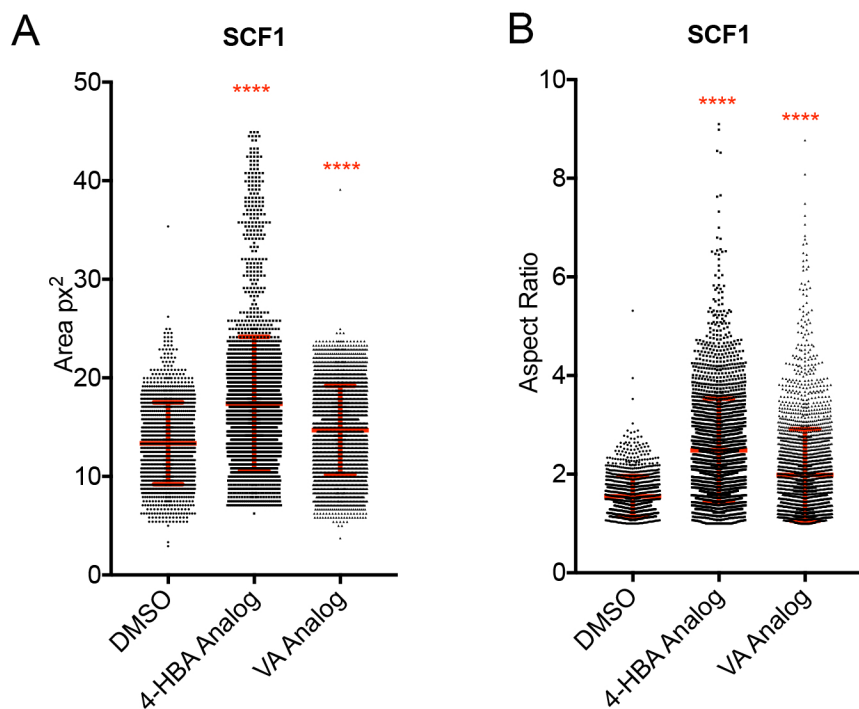

**Fig. S10.** A. Area (px<sup>2</sup>) of *E. lignolyticus* cells following internalization of 4-HBA or VA for 4 hours. Cells areas were measured using DAPI signal. \*\*\*\*p<0.0001 by Kruskal-Wallis test. Red bars mark the average and whiskers are the standard deviation. N=3 biological replicates. B. Aspect ratio measurements of *E. lignolyticus* cells following internalization of 4-HBA or VA for 4 hours. Cells aspect ratios were measured using the longest and shortest axis using DAPI signal. \*\*\*\*p<0.0001 by Kruskal-Wallis test. Red bars mark the average and whiskers are the standard deviation. N=3 biological replicates.
